# Supplementary material for: 1H-NMR based metabolic study of MMTV-PyMT mice along with pathological progress to screen biomarkers for the early diagnosis of breast cancer
Source: Royal Society of Chemistry journal article supplement (doi:10.1039/d1mo00387a), 2021-12-03
Supplement: d1mo00387a2.pdf [file d1mo00387a2.pdf]

## Supplementary Pathological data for breast cancer and control groups

studied in this work.

| No. | Age/Sex   | Pathology Diagnose                          |
|-----|-----------|---------------------------------------------|
| 1   | 36/female | None abnormal sonographic                   |
| 2   | 30/female | Corresponded breast hyperplasia sonographic |
| 3   | 75/female | Corresponded breast hyperplasia sonographic |
| 4   | 38/female | Corresponded breast hyperplasia sonographic |
| 5   | 39/female | Corresponded breast hyperplasia sonographic |
| 6   | 55/female | Corresponded breast hyperplasia sonographic |
| 7   | 27/female | Corresponded breast hyperplasia sonographic |
| 8   | 32/female | Corresponded breast hyperplasia sonographic |
| 9   | 28/female | Corresponded breast hyperplasia sonographic |
| 10  | 46/female | Corresponded breast hyperplasia sonographic |
| 11  | 41/female | Corresponded breast hyperplasia sonographic |
| 12  | 70/female | Corresponded breast hyperplasia sonographic |
| 13  | 44/female | Corresponded breast hyperplasia sonographic |
| 14  | 31/female | Corresponded breast hyperplasia sonographic |
| 15  | 57/female | Corresponded breast hyperplasia sonographic |
| 16  | 49/female | None abnormal sonographic                   |
| 17  | 60/female | Corresponded senile breast sonographic      |
| 18  | 32/female | Corresponded breast hyperplasia sonographic |
| 19  | 53/female | Corresponded breast hyperplasia sonographic |
| 20  | 31/female | None abnormal sonographic                   |
| 21  | 50/female | None abnormal sonographic                   |
| 22  | 31/female | None abnormal sonographic                   |
| 23  | 39/female | Corresponded breast hyperplasia sonographic |
| 24  | 61/female | Corresponded senile breast sonographic      |
| 25  | 80/female | Corresponded senile breast sonographic      |
| 26  | 56/female | Corresponded breast hyperplasia sonographic |
| 27  | 40/female | Corresponded breast hyperplasia sonographic |

---

|    |           |                                                             |
|----|-----------|-------------------------------------------------------------|
| 28 | 63/female | Invasive breast cancer III                                  |
| 29 | 61/female |                                                             |
| 30 | 60/female | Intraductal carcinoma with local invasion                   |
| 31 | 59/female |                                                             |
| 32 | 47/female | Invasive breast cancer III                                  |
| 33 | 48/female |                                                             |
| 34 | 38/female | Invasive breast cancer III                                  |
| 35 | 45/female |                                                             |
| 36 | 62/female | Invasive breast cancer II                                   |
| 37 | 60/female |                                                             |
| 38 | 67/female | Invasive breast cancer III                                  |
| 39 | 57/female |                                                             |
| 40 | 45/female | Invasive breast cancer III/high-level intraductal carcinoma |
| 41 | 61/female |                                                             |
| 42 | 63/female | Invasive breast cancer III                                  |
| 43 | 51/female | Nipple Paget's with intraductal carcinoma                   |
|    |           | Invasive lobular carcinoma/ Lobular carcinoma in situ       |
|    |           |                                                             |
|    |           | Invasive breast cancer III                                  |
|    |           | High-level intraductal carcinoma                            |
|    |           |                                                             |
|    |           | Invasive breast cancer III                                  |
|    |           | Invasive breast cancer with liver metastasis                |
|    |           | Multifocal intraductal carcinoma                            |
|    |           |                                                             |
|    |           | Invasive breast cancer III                                  |

---

Control group:1-27; Breast cancer group: 28-43.

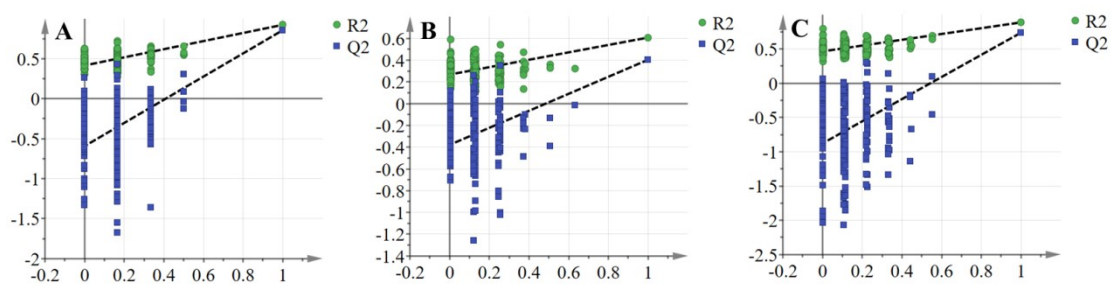

**Figure 1** A ,B and C were validations for the models in figure 4 A1,A2 and A3 in the manuscript, respectively. A,  $R^2=(0.0,0.416),Q^2=(0.0,-0.593)$ ; B,  $R^2=(0.0,0.268),Q^2=(0.0,-0.378)$ ; C,  $R^2=(0.0,0.465),Q^2=(0.0,-0.878)$ .

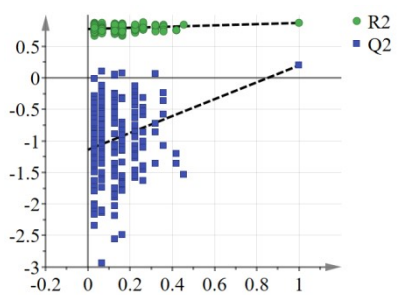

**Figure 2** The validation for the OPLS-DA model in figure 5 in the manuscript.  $R^2=(0.0,0.775)$ ,  $Q^2=(0.0,-1.14)$ .

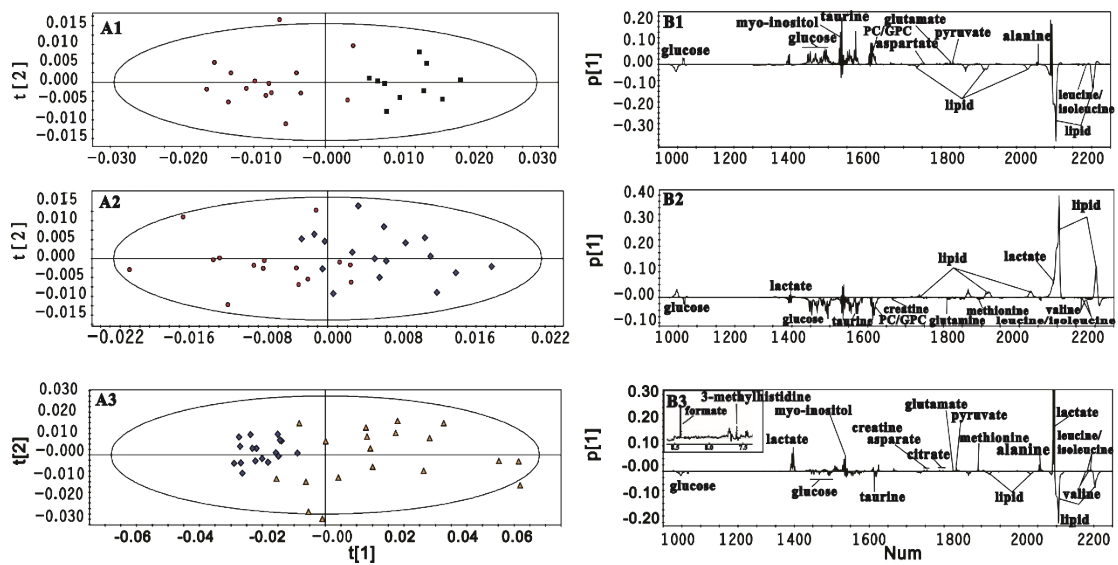

**Figure 3** PCA scores plots (A) and PCA loadings plots (B) for MMTV-PyMT transgenic mice at hyperplasia (■, n=9), adenoma (●, n=14), early carcinoma (◆, n=16) and late carcinoma (▲, n=19) stages. A1,  $R^2X=0.851$ ,  $Q^2=0.693$ ; A2,  $R^2X=0.740$ ,  $Q^2=0.610$ ; A3,  $R^2X=0.928$ ,  $Q^2=0.885$ .
